# Supplementary material
Source: bioRxiv or medRxiv preprint supplement (https://www.biorxiv.org/highwire/filestream/36829/field_highwire_adjunct_files/1/046946-2.pdf)
Supplement: Supplementary file [file 046946-2.pdf]

1 Supporting Information to the paper Zelený, D. Bias in community-weighted mean analysis of  
2 plant functional traits and species indicator values. *Journal of Vegetation Science*.

3 **Appendix S2. Weighted-mean approach applied on 2D simulated**

4 **community data sets: additional results**

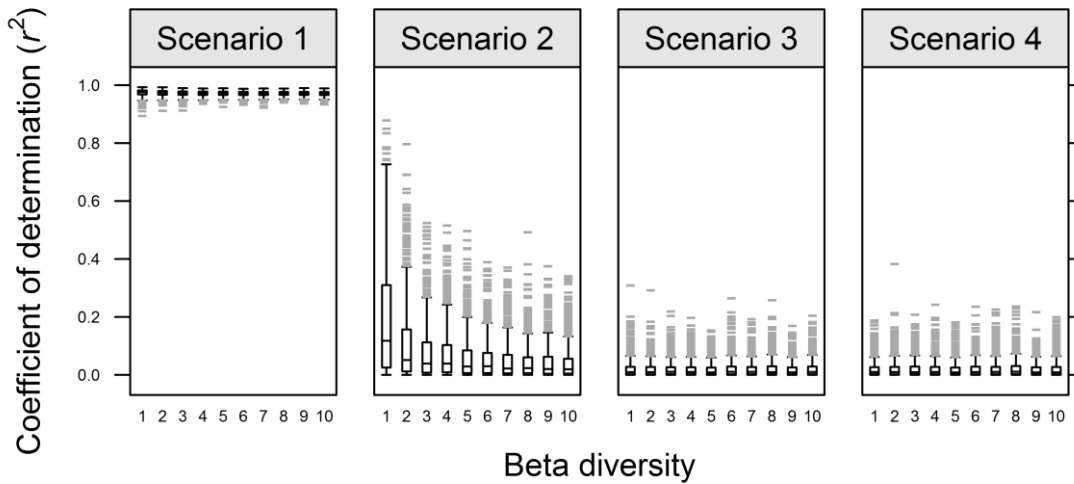

5

6 **Appendix S2: Figure S1**

7 Coefficient of determination ( $r^2$ ) for linear least squares regression of the CWM on sample  
8 attributes for each of the four scenarios and 10 levels of beta diversity. Grey horizontal bars  
9 are outliers.

10

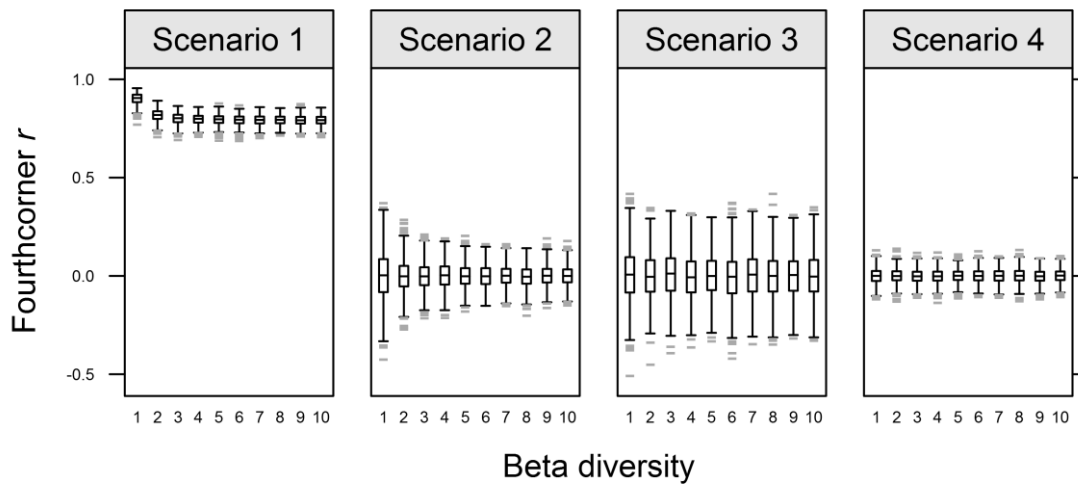

11

12 **Appendix S2: Figure S2**

13 The fourth-corner statistic  $r$  between **R**, **L** and **Q** matrices for each of the four scenarios and  
 14 10 levels of beta diversity. Grey horizontal bars are outliers.

15

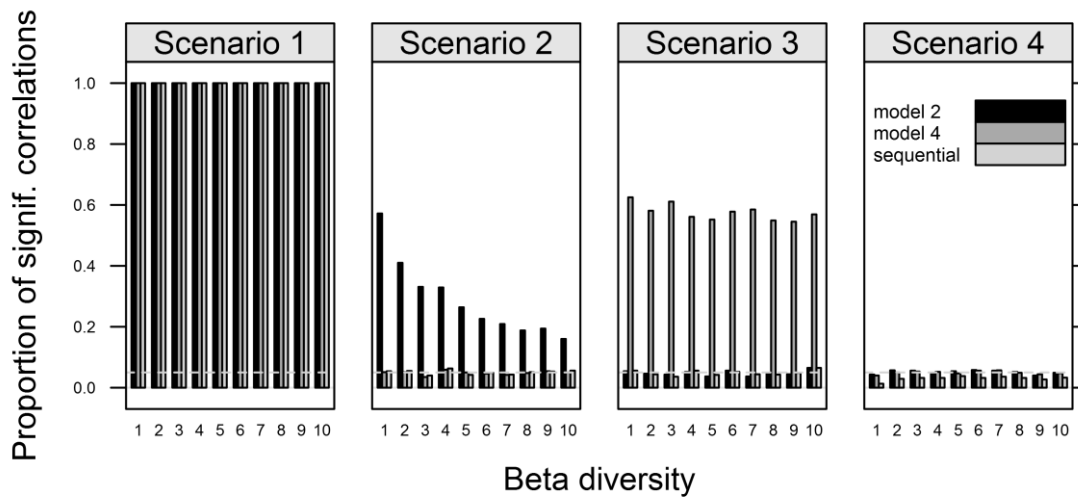

16

17 **Appendix S2: Figure S3**

18 Proportion of significant results ( $P < 0.05$ ) of the fourth-corner analysis between **R**, **L** and **Q**  
 19 matrix, tested by model 2 (permuting sample attributes in **R**), model 4 (permuting species  
 20 attributes in **Q**) and the sequential permutation test (sensu ter Braak et al. 2012, consisting of  
 21 the sequence of model 2 and model 4 test). Results are reported for each of the four scenarios  
 22 and 10 levels of beta diversity.

23

24 **References**

25 ter Braak, C.J.F., Cormont, A. & Dray, S. 2012. Improved testing of species traits-  
 26 environment relationships in the fourth-corner problem. *Ecology* 93: 1525–1526.
